# Supplementary material
Source: PubMed Central journal article supplement (PMC3134592)
Supplement: NIHMS281670-supplement-01.pdf [file NIHMS281670-supplement-01.pdf]

## Supplemental Information 1

### Genotype frequencies based on transcriptional activity groups (5HTTLPR & rs25531)

Genotypes for the rs25531 SNP were available for  $n = 446$  individuals (corresponding to 97.2% of individuals with available 5HTTLPR genotype data). 26.5% ( $n = 118$ ) of the sample were assigned to the transcriptional activity (TA) group low/low, the TA high/low group comprised 50% ( $n = 223$ ), and the TA high/high group comprised 23.5% ( $n=105$ ). No deviation from Hardy-Weinberg equilibrium was observed ( $p = .99$ )

**Table S1.** The relationship between delay aversion and 5-HTTLPR genotype as a function of ADHD status. Figures in parentheses are standard errors.

| Delay<br>Aversion | 5-HTTLPR incl. rs25531 |                 |                |
|-------------------|------------------------|-----------------|----------------|
|                   | low/low                | low/high        | high/high      |
| ADHD              | 10.13<br>(2.34)        | 15.21<br>(2.19) | 8.41<br>(2.35) |
| none              | 7.20<br>(3.20)         | 15.06<br>(3.18) | 3.30<br>(3.65) |

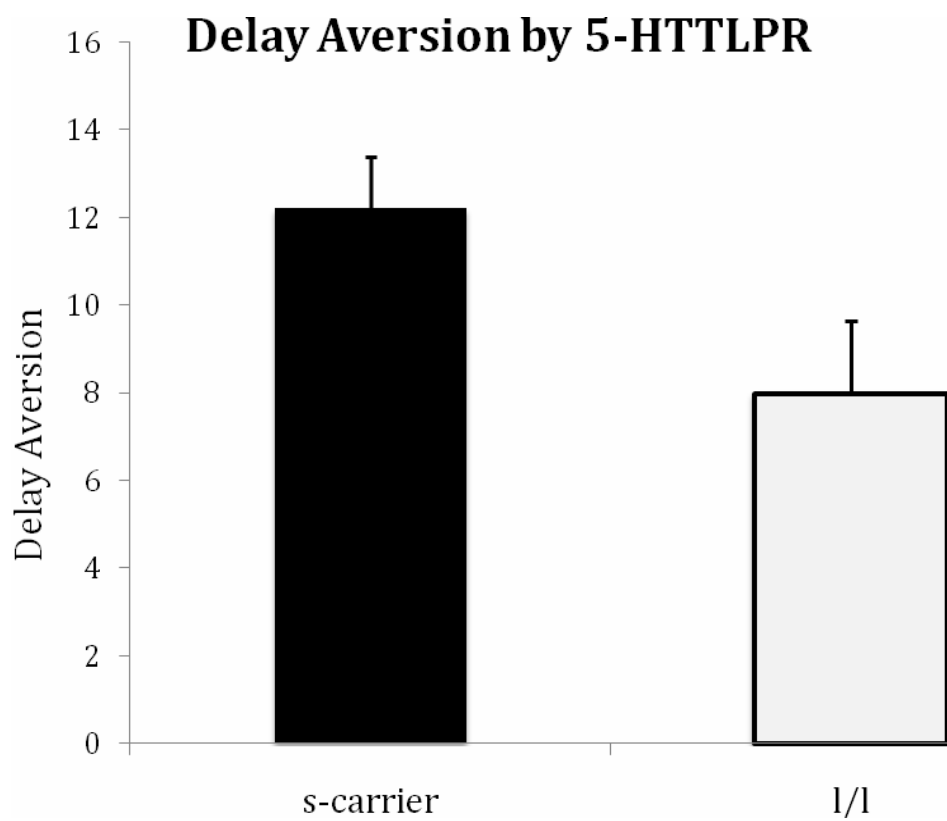

**Figure S1.** The relationship between delay aversion and 5-HTTLPR genotype as a function of ADHD status.
